# Supplementary material
Source: PubMed Central journal article supplement (PMC5945064)
Supplement: JSLHR-60-2891-s001.pdf [file JSLHR-60-2891-s001.pdf]

**Supplemental Material S1.** Participant descriptions.

Demographic characteristics and test scores of the developmental language disorder (DLD) and normal development (ND) groups in Study 1:

| Domain                 | Measurement tool            | DLD<br><i>M (SD)</i> | ND<br><i>M (SD)</i> | Unit of measure     | Normative<br><i>M (SD)</i> | <i>p</i> | Cohen's <i>d</i> |
|------------------------|-----------------------------|----------------------|---------------------|---------------------|----------------------------|----------|------------------|
| Age                    | Self-report                 | 250 (16)             | 250 (20)            | Months              |                            | .86      |                  |
| Education              | Self-report                 | 13.8 (1.4)           | 14.2 (1.5)          | Years               |                            | .56      |                  |
| Nonverbal IQ           | KBIT                        | 100 (14.2)           | 111 (12.3)          | Standard score      | 100 (15)                   | < .0001  | -0.83            |
| Spelling               | *Nonstandardized probe      | 4.9 (2.9)            | 11.6 (2.8)          | Raw score out of 15 |                            | < .0001  | -2.35            |
| Sentence comprehension | Token Test                  | 35 (4.8)             | 41 (2.6)            | Raw score out of 44 |                            | < .0001  | -1.55            |
| Phonological memory    | **Nonstandardized probe     | 87 (5.0)             | 91 (4.6)            | Raw score out of 96 |                            | < .0001  | -0.83            |
| Sentence memory        | Sentence Recall from CELF-3 | 9 (2.9)              | 12 (2.1)            | Standard score      | 10 (3)                     | < .0001  | -1.18            |
| Receptive vocabulary   | PPVT-4                      | 102 (11.3)           | 113 (12.40)         | Standard score      | 100 (15)                   | < .0001  | -0.93            |
| Expressive vocabulary  | EVT-2                       | 108 (12.0)           | 120 (11.4)          | Standard score      | 100 (15)                   | < .0001  | -1.03            |
| Defining vocabulary    | Word Definition from CELF-4 | 12 (2.3)             | 14 (1.4)            | Scaled score        | 10 (3)                     | < .0001  | -1.05            |

*Note.* KBIT = Kaufman Brief Intelligence Test (Kaufman & Kaufman, 2004); CELF-3 = Clinical Evaluation of Language Fundamentals–Third Edition (Semel, Wiig, & Secord, 1995); PPVT-4 = Peabody Picture Vocabulary Test–Fourth Edition (Dunn & Dunn, 2007); EVT-2 = Expressive Vocabulary Test–Second Edition (Williams, 2007). \*Fidler, Plante, & Vance (2011). \*\*Dollaghan & Campbell (1998).

**References**

Dollaghan, C., & Campbell, T. F. (1998). Nonword repetition and child language impairment. *Journal of Speech, Language, and Hearing Research, 41*, 1136–1146.

Dunn, L., & Dunn, L. (2007). *Manual: Peabody Picture Vocabulary Test–Fourth Edition*. Bloomington, MN: Pearson Assessments.

- Fidler, L. J., Plante, E., & Vance, R. (2011). Identification of adults with developmental language impairments. *American Journal of Speech-Language Pathology*, 20(1), 2–13.
- Kaufman, A. S., & Kaufman, N. L. (2004). *Kaufman Brief Intelligence Test—Second Edition*. Bloomington, MN: Pearson, Inc.
- Semel, E. M., Wiig, E. H., & Secord W. A. (1995). *Clinical Evaluation of Language Fundamentals—Third Edition*. San Antonio, TX: The Psychological Corporation.
- Williams, K. T. (2007). *Expressive Vocabulary Test—Second Edition*. San Antonio, TX: Pearson.

---

Number of participants in the DLD and ND groups by gender, ethnicity, and race in Study 1:

| <b>Variable</b> |                               | <b>DLD</b> | <b>ND</b> |
|-----------------|-------------------------------|------------|-----------|
| Gender          | Male                          | 29         | 30        |
|                 | Female                        | 30         | 30        |
| Ethnicity       | Hispanic/Latino               | 1          | 3         |
|                 | Not Hispanic/Latino           | 44         | 53        |
|                 | Not reported                  | 14         | 4         |
| Race            | African American              | 3          | 1         |
|                 | American Indian/Alaska Native | 0          | 1         |
|                 | Asian                         | 1          | 4         |
|                 | Caucasian                     | 50         | 51        |
|                 | More than one race            | 5          | 1         |
|                 | Not reported                  | 0          | 2         |

Demographic characteristics and test scores of the DLD and ND groups in Study 2:

| Domain                 | Measurement tool            | DLD<br><i>M (SD)</i> | ND<br><i>M (SD)</i> | Unit of measure     | Normative<br><i>M (SD)</i> | <i>p</i> | Cohen's <i>d</i> |
|------------------------|-----------------------------|----------------------|---------------------|---------------------|----------------------------|----------|------------------|
| Age                    | Self-report                 | 248 (22)             | 252 (21)            | Months              |                            | .58      |                  |
| Education              | Self-report                 | 13.8 (1.5)           | 14.4 (1.9)          | Years               |                            | .26      |                  |
| Nonverbal IQ           | KBIT                        | 103 (12.8)           | 109 (10.3)          | Standard score      | 100 (15)                   | .12      |                  |
| Spelling               | *Nonstandardized probe      | 4.8 (2.4)            | 12.1 (2.2)          | Raw score out of 15 |                            | < .0001  | -3.17            |
| Sentence comprehension | Token Test                  | 36 (4.4)             | 40 (2.2)            | Raw score out of 44 |                            | < .0001  | -1.15            |
| Phonological memory    | **Nonstandardized probe     | 87 (4.4)             | 90 (3.0)            | Raw score out of 96 |                            | .001     | -0.80            |
| Sentence memory        | Sentence recall from CELF-3 | 9 (2.7)              | 11 (2.1)            | Standard score      | 10 (3)                     | .003     | -0.83            |
| Receptive vocabulary   | PPVT-4                      | 101 (11.3)           | 117 (12.40)         | Standard score      | 100 (15)                   | < .0001  | -1.35            |
| Expressive vocabulary  | EVT-2                       | 108 (11.7)           | 120 (11.9)          | Standard score      | 100 (15)                   | .0009    | -1.02            |
| Defining vocabulary    | Word definition from CELF-4 | 13 (1.6)             | 14 (1.0)            | Scaled score        | 10 (3)                     | .014     | -0.75            |

*Note.* KBIT = Kaufman Brief Intelligence Test (Kaufman & Kaufman, 2004); CELF-3 = Clinical Evaluation of Language Fundamentals–Third Edition (Semel, Wiig, & Secord, 1995); PPVT-4 = Peabody Picture Vocabulary Test–Fourth Edition (Dunn & Dunn, 2007); EVT-2 = Expressive Vocabulary Test–Second Edition (Williams, 2007). \*Fidler, Plante, & Vance (2011). \*\*Dollaghan & Campbell (1998).

**References**

Dollaghan, C., & Campbell, T. F. (1998). Nonword repetition and child language impairment. *Journal of Speech, Language, and Hearing Research, 41*, 1136–1146.

Dunn, L., & Dunn, L. (2007). *Manual: Peabody Picture Vocabulary Test–Fourth Edition*. Bloomington, MN: Pearson Assessments.

Fidler, L. J., Plante, E., & Vance, R. (2011). Identification of adults with developmental language impairments. *American Journal of Speech-Language Pathology, 20*(1), 2–13.

Kaufman, A. S., & Kaufman, N. L. (2004). *Kaufman Brief Intelligence Test–Second Edition*. Bloomington, MN: Pearson, Inc.

Semel, E. M., Wiig, E. H., & Secord W. A. (1995). *Clinical Evaluation of Language Fundamentals—Third Edition*. San Antonio, TX: The Psychological Corporation.

Williams, K. T. (2007). *Expressive Vocabulary Test—Second Edition*. San Antonio, TX: Pearson.

---

Number of participants in the DLD and ND groups by gender, ethnicity, and race in Study 2:

| Variable  |                               | DLD | ND |
|-----------|-------------------------------|-----|----|
| Gender    | Male                          | 11  | 11 |
|           | Female                        | 12  | 13 |
| Ethnicity | Hispanic/Latino               | 3   | 3  |
|           | Not Hispanic/Latino           | 16  | 18 |
|           | Not reported                  | 4   | 3  |
| Race      | African American              | 2   | 1  |
|           | American Indian/Alaska Native | 1   | 0  |
|           | Asian                         | 0   | 0  |
|           | Caucasian                     | 19  | 21 |
|           | More than one race            | 0   | 2  |
|           | Not reported                  | 1   | 0  |
