# Supplementary material
Source: PubMed Central journal article supplement (PMC5945064)
Supplement: JSLHR-60-2891-s002.pdf [file JSLHR-60-2891-s002.pdf]

## Supplemental Material S2. Stimuli for Study 2.

Training stimuli presented in phonetic notation, matched with orthographic real words from which derived:

| Set A   |          | Set B   |          | Set C   |          |
|---------|----------|---------|----------|---------|----------|
| Train   | Real     | Train   | Real     | Train   | Real     |
| nɛklədʒ | necklace | dʌndʒəp | dungeon  | baisət  | bison    |
| blɑvəd  | blossom  | fəʊntɪk | fountain | tʃɪpmʌz | chipmunk |
| dræməs  | dragon   | gɑrlɪd  | garlic   | dɛzəg   | desert   |
| fəʊsɪb  | faucet   | dʒækɪz  | jacket   | glɪtəf  | glitter  |
| kɪtʃɪv  | kitchen  | kətəf   | cottage  | kæktəb  | cactus   |
| klətəg  | clover   | mɛləg   | melon    | nudək   | noodle   |
| mægnəf  | magnet   | plæsəv  | planet   | pɛɪntəf | painter  |
| sələp   | salad    | stʌvəb  | stomach  | skunəv  | scooter  |
| sɪmbək  | cymbal   | trægɪf  | traffic  | spailəp | spider   |

Stimulus pairings for the visual world paradigm:

| Trained | Cohort   | Noncohort | Real     | Cohort   | Noncohort |
|---------|----------|-----------|----------|----------|-----------|
| blɑvəd  | blossom  | glitter   | cleaner  | cleaver  | flower    |
| dræməs  | dragon   | spider    | cradle   | crater   | blender   |
| klətəg  | clover   | scooter   | blister  | blizzard | trumpet   |
| mægnəf  | magnet   | painter   | goblet   | goblin   | tango     |
| nɛklədʒ | necklace | cymbal    | parcel   | parsley  | mustard   |
| sɪmbək  | cymbal   | necklace  | banker   | banquet  | piston    |
| fəʊsɪb  | faucet   | kitchen   | comet    | comic    | circus    |
| kɪtʃɪv  | kitchen  | faucet    | rocker   | rocket   | donor     |
| sələp   | salad    | desert    | summer   | summit   | palace    |
| plæsəv  | planet   | stomach   | cricket  | crystal  | platter   |
| stʌvəb  | stomach  | clover    | plastic  | platter  | blizzard  |
| trægɪf  | traffic  | blossom   | truffle  | trumpet  | gravel    |
| dʌndʒəp | dungeon  | cactus    | mustang  | mustard  | goblin    |
| fəʊntɪk | fountain | magnet    | pistol   | piston   | bandit    |
| gɑrlɪd  | garlic   | dungeon   | tangle   | tango    | cyclops   |
| dʒækɪz  | jacket   | bison     | letter   | lettuce  | summit    |
| kətəf   | cottage  | salad     | palette  | palace   | medic     |
| mɛləg   | melon    | noodle    | donut    | donor    | rocket    |
| glɪtəf  | glitter  | dragon    | blemish  | blender  | cleaver   |
| skunəv  | scooter  | traffic   | flounder | flower   | crater    |
| spailəp | spider   | planet    | granite  | gravel   | crystal   |
| tʃɪpmʌz | chipmunk | fountain  | cyclone  | cyclops  | parsley   |

| <b>Trained</b> | <b>Cohort</b> | <b>Noncohort</b> | <b>Real</b> | <b>Cohort</b> | <b>Noncohort</b> |
|----------------|---------------|------------------|-------------|---------------|------------------|
| kæktəb         | cactus        | garlic           | temper      | temple        | banquet          |
| peɪntəf        | painter       | chipmunk         | bandage     | bandit        | temple           |
| baisət         | bison         | melon            | surfer      | circus        | comic            |
| dɛzəg          | desert        | cottage          | medal       | medic         | baker            |
| nudək          | noodle        | jacket           | bacon       | baker         | lettuce          |
